# Supplementary material
Source: PubMed Central journal article supplement (PMC10248812)
Supplement: jamadermatol-e231353-s001.pdf [file jamadermatol-e231353-s001.pdf]

## Supplementary Online Content

Stevens JS, Murad F, Smile TD, et al. Validation of the 2022 National Comprehensive Cancer Network risk stratification for cutaneous squamous cell carcinoma. *JAMA Dermatol*. Published online June 7, 2023. doi:10.1001/jamadermatol.2023.1353

### **eTable.** Univariate Analysis

This supplementary material has been provided by the authors to give readers additional information about their work.

**eTable. Univariate Analysis**

| <b>Local recurrence (N = 188)</b> |            |                |               |
|-----------------------------------|------------|----------------|---------------|
|                                   | <b>SHR</b> | <b>P Value</b> | <b>95% CI</b> |
| High risk                         | 2.04       | 0.003          | 1.27—3.30     |
| Very high risk                    | 14.0       | <0.001         | 8.68—22.6     |
| Male gender                       | 2.32       | <0.001         | 1.66—3.25     |
| Age                               | 0.99       | 0.044          | 0.97-0.99     |
| Surgical modality                 | 0.60       | 0.002          | 0.44—0.83     |

  

| <b>Nodal metastasis (N = 96)</b> |            |                |               |
|----------------------------------|------------|----------------|---------------|
|                                  | <b>SHR</b> | <b>P Value</b> | <b>95% CI</b> |
| High risk                        | 4.78       | 0.010          | 1.46—15.7     |
| Very high risk                   | 76.9       | <0.001         | 24.2—244.5    |
| Male gender                      | 3.50       | <0.001         | 2.05—5.99     |
| Age                              | 0.99       | 0.644          | 0.98—1.01     |
| Surgical modality                | 0.68       | 0.073          | 0.44—0.99     |

  

| <b>Distant metastasis (N = 32)</b> |                       |                |                            |
|------------------------------------|-----------------------|----------------|----------------------------|
|                                    | <b>SHR</b>            | <b>P Value</b> | <b>95% CI</b>              |
| High risk                          | 3.8 x10 <sup>6</sup>  | <0.001         | 2.76—5.26 x10 <sup>6</sup> |
| Very high risk                     | 14.6 x10 <sup>7</sup> | <0.001         | 5.22—10.3 x10 <sup>7</sup> |
| Male gender                        | 2.48                  | 0.034          | 1.07—5.73                  |
| Age                                | 0.98                  | 0.118          | 0.95—0.99                  |
| Surgical modality                  | 0.28                  | 0.001          | 0.13—0.60                  |

  

| <b>Disease specific death (N = 114)</b> |            |                |               |
|-----------------------------------------|------------|----------------|---------------|
|                                         | <b>SHR</b> | <b>P Value</b> | <b>95% CI</b> |
| High risk                               | 3.91       | 0.026          | 1.18—13.0     |
| Very high risk                          | 104.4      | <0.001         | 33.0—329.7    |
| Male gender                             | 3.08       | <0.001         | 1.92—4.95     |
| Age                                     | 0.99       | 0.241          | 0.98—1.01     |
| Surgical modality                       | 0.41       | <0.001         | 0.27—0.62     |
