# Supplementary material
Source: PubMed Central journal article supplement (PMC10248812)
Supplement: jamadermatol-e231353-s002.pdf [file jamadermatol-e231353-s002.pdf]

## Data Sharing Statement

Stevens. Validation of the 2022 National Comprehensive Cancer Network Risk Stratification for Cutaneous Squamous Cell Carcinoma. *JAMA Dermatol.* Published June 07, 2023.  
doi:10.1001/jamadermatol.2023.1353

### Data

**Data available:** No
